# Supplementary material for: Veterans’ Service Utilization Patterns After Alcohol and Opioid Detoxification in VHA Care
Source: Atypon-hosted journal article supplement (doi:10.1176/appi.ps.201400579), 2016-01-14
Supplement: appi.ps.201400579.ds001.pdf [file appi.ps.201400579.ds001.pdf]

## Patient and facility factors predicting receipt of detoxification (reduced model).

| Factor                                                | Estimate | SE  | p     | OR   | 95% CI    |
|-------------------------------------------------------|----------|-----|-------|------|-----------|
| Intercept                                             | -3.01    | .16 | <.001 |      |           |
| Female                                                | -.18     | .04 | <.001 | .83  | .78-.90   |
| Age                                                   | -.01     | .00 | <.001 | .99  | .99-.99   |
| Race and ethnicity<br>(vs non-Hispanic White)         |          |     |       |      |           |
| Hispanic                                              | -.22     | .04 | <.001 | .81  | .75-.86   |
| Non-Hispanic Black                                    | -.37     | .02 | <.001 | .69  | .67-.72   |
| Asian                                                 | -.22     | .11 | .04   | .81  | .66-.99   |
| Other                                                 | -.29     | .03 | <.001 | .75  | .70-.79   |
| Homeless                                              | 1.13     | .02 | <.001 | 3.09 | 3.00-3.19 |
| Deyo-Comorbidity                                      | .10      | .01 | <.001 | 1.11 | 1.09-1.13 |
| Any addiction visits                                  | -.08     | .02 | <.001 | .93  | .89-.97   |
| Number of addiction visits                            | .00      | .00 | .01   | 1.00 | 1.00-1.00 |
| Any alcohol diagnosis                                 | .56      | .02 | <.001 | 1.76 | 1.70-1.81 |
| Any opioid diagnosis                                  | .22      | .03 | <.001 | 1.25 | 1.17-1.33 |
| Outpatient addiction services available evenings      | .21      | .16 | .17   | 1.24 | .91-1.69  |
| Number Addiction Therapists/Counselors                | .04      | .02 | .08   | 1.04 | 1.00-1.08 |
| Number vacant Addiction Therapist/Counselor positions | -.19     | .07 | <.001 | .82  | .72-.94   |
| Number full-time staff at facility                    | .00      | .00 | .52   | 1.00 | .99-1.01  |

Patient and facility factors predicting receipt of detoxification follow-up appointment (reduced model).

| Factor                                                         | Estimate | SE  | p     | OR   | 95% CI    |
|----------------------------------------------------------------|----------|-----|-------|------|-----------|
| Intercept                                                      | -.52     | .12 | <.001 |      |           |
| Female                                                         | .07      | .08 | .41   | 1.07 | .91-1.25  |
| Age                                                            | -.01     | .00 | <.001 | .99  | .99-.99   |
| Race and ethnicity<br>(vs non-Hispanic<br>White)               |          |     |       |      |           |
| Hispanic                                                       | .03      | .08 | .67   | 1.04 | .89-1.21  |
| Non-Hispanic Black                                             | .02      | .04 | .63   | 1.02 | .94-1.11  |
| Asian                                                          | -.22     | .25 | .39   | .80  | .49-1.32  |
| Other                                                          | .05      | .07 | .45   | 1.06 | .92-1.21  |
| Homeless                                                       | .48      | .04 | <.001 | 1.62 | 1.51-1.73 |
| Deyo-Comorbidity                                               | -.12     | .02 | <.001 | .89  | .86-.92   |
| Any addiction visits                                           | .64      | .04 | <.001 | 1.91 | 1.77-2.05 |
| Number of addiction<br>visits                                  | .00      | .00 | .02   | 1.00 | 1.00-1.01 |
| Any alcohol<br>diagnosis                                       | .18      | .05 | <.001 | 1.20 | 1.08-1.33 |
| Any opioid diagnosis                                           | -.10     | .05 | .06   | .91  | .82-1.00  |
| Outpatient addiction<br>services weekends                      | .07      | .10 | .49   | 1.07 | .88-1.31  |
| Number Social<br>Workers                                       | .02      | .02 | .38   | 1.02 | .98-1.05  |
| Number vacant<br>Addiction<br>Therapist/Counselor<br>positions | -.07     | .04 | .11   | .93  | .86-.92   |
| Number full-time<br>staff at facility                          | .01      | .00 | .18   | 1.01 | 1.00-101  |

Patient and facility factors predicting receipt of substance use disorder treatment within 30 days after detoxification (reduced model)

| Factor                                        | Estimate | SE  | p     | OR   | 95% CI    |
|-----------------------------------------------|----------|-----|-------|------|-----------|
| Intercept                                     | -.52     | .12 | <.001 |      |           |
| Female                                        | .02      | .08 | .83   | 1.02 | .85-1.17  |
| Age                                           | -.02     | .00 | <.001 | .99  | .98-.99   |
| Race and ethnicity<br>(vs non-Hispanic White) |          |     |       |      |           |
| Hispanic                                      | .00      | .08 | .99   | 1.00 | .85-1.17  |
| Non-Hispanic Black                            | .20      | .04 | <.001 | 1.23 | 1.12-1.34 |
| Asian                                         | .19      | .25 | .45   | 1.21 | .74-1.99  |
| Other                                         | .09      | .07 | .21   | 1.09 | .95-1.26  |
| Homeless                                      | .52      | .04 | <.001 | 1.69 | 1.57-1.81 |
| Deyo-Comorbidity                              | -.12     | .02 | <.001 | .89  | .86-.92   |
| Any addiction visits                          | 1.01     | .04 | <.001 | 2.74 | 2.54-2.96 |
| Number addiction visits                       | .00      | .00 | .00   | 1.00 | 1.00-1.01 |
| Any alcohol diagnosis                         | .21      | .06 | .00   | 1.23 | 1.11-1.37 |
| Any opioid diagnosis                          | -.12     | .05 | .02   | .89  | .80-.98   |
| Number Social Workers                         | .01      | .02 | .55   | 1.01 | .98-1.05  |
| Number full-time staff at facility            | .01      | .00 | .13   | 1.01 | 1.00-1.01 |

Patient and facility factors predicting receipt of substance use disorder treatment within 60 days after detoxification (reduced model)

| Factor                                          | Estimate | SE  | p     | OR   | 95% CI    |
|-------------------------------------------------|----------|-----|-------|------|-----------|
| Intercept                                       | -.29     | .12 | .02   |      |           |
| Female                                          | .06      | .08 | .45   | 1.07 | .90-1.26  |
| Age                                             | -.02     | .00 | <.001 | .98  | .98-.99   |
| Race and ethnicity<br>(vs non-Hispanic White)   |          |     |       |      |           |
| Hispanic                                        | -.05     | .08 | .56   | .95  | .81-1.12  |
| Non-Hispanic Black                              | .19      | .05 | <.001 | 1.21 | 1.11-1.32 |
| Asian                                           | .11      | .26 | .68   | 1.11 | .67-1.85  |
| Other                                           | .04      | .07 | .58   | 1.04 | .90-1.20  |
| Homeless                                        | .66      | .04 | <.001 | 1.93 | 1.80-2.07 |
| Deyo-Comorbidity                                | -.13     | .02 | <.001 | .88  | .85-.92   |
| Any addiction visits                            | 1.08     | .04 | <.001 | 2.94 | 2.72-3.18 |
| Number addiction visits                         | .00      | .00 | .00   | 1.01 | 1.00-1.01 |
| Any alcohol diagnosis                           | .22      | .06 | <.001 | 1.24 | 1.11-1.38 |
| Any opioid diagnosis                            | -.14     | .05 | .01   | .87  | .78-.97   |
| Number patients wait listed addiction treatment | .00      | .00 | .60   | 1.00 | 1.00-1.01 |
| Number Social Workers                           | .00      | .02 | .95   | 1.00 | .97-1.04  |
| Number full-time staff at facility              | .01      | .00 | .06   | 1.01 | 1.00-1.02 |
